# Supplementary material for: An in silico and chemical approach towards small protein production and application in phosphoproteomics
Source: Royal Society of Chemistry journal article supplement (doi:10.1039/c4ra16934d), 2015-01-01
Supplement: c4ra16934d1.pdf [file c4ra16934d1.pdf]

## **An *in silico* and chemical approach towards small protein production and application in phosphoproteomics**

Ana M.G.C. Dias <sup>a,b</sup>, Olga Iranzo <sup>b\*</sup> and Ana C.A. Roque <sup>a\*</sup>

Received (in XXX, XXX) Xth XXXXXXXXXX 20XX, Accepted Xth XXXXXXXXXX 20XX

DOI: 10.1039/b000000x

---

<sup>a</sup> UCIBIO, REQUIMTE, Departamento de Química, Faculdade de Ciências e Tecnologia, Universidade Nova de Lisboa, Campus Caparica, 2829-516 Caparica, Portugal, Fax: (+351) 21 294 8550; E-mail: [cecilia.roque@fct.unl.pt](mailto:cecilia.roque@fct.unl.pt)

<sup>b</sup> Aix Marseille Université, Centrale Marseille, CNRS, iSm2 UMR 7313, 13397 Marseille, France; E-mail: [olga.iranzo@univ-amu.fr](mailto:olga.iranzo@univ-amu.fr), Previous address: Instituto de Tecnologia Química e Biológica António Xavier, Universidade Nova de Lisboa, 2780-157 Oeiras, Portugal

### **Supplementary Information:**

#### **Content List:**

|                                                                                                     | Pages |
|-----------------------------------------------------------------------------------------------------|-------|
| <b>S1 - <i>In silico</i> studies</b>                                                                |       |
| S1.1. - Molecular Dynamics Simulations - Stability studies - hPin1_WWdomain structures              | 2     |
| S1.2. - Molecular Docking - Affinity Studies - hPin1_WWmutated                                      | 3     |
| <b>S2. - Peptide Solid-phase Chemical Synthesis and Characterization</b>                            |       |
| S2.1. - Conditions for the standard and pseudoproline units protocol for peptide chemical synthesis | 4     |
| S2.2. - Reverse-Phase HPLC hPin1_WWmutated                                                          | 5     |
| S2.3 - Electrospray Ionization-Mass spectra (ESI-MS)                                                | 6     |
| ESI-MS hPin1_WWmutated                                                                              | 6     |

## S1 - *In silico* Studies:

### S1.1. - Molecular Dynamics simulations - Stability studies - hPin1\_WW domain structures:

The protocols for preparation of the structure for *in silico studies* can be found in the main text.

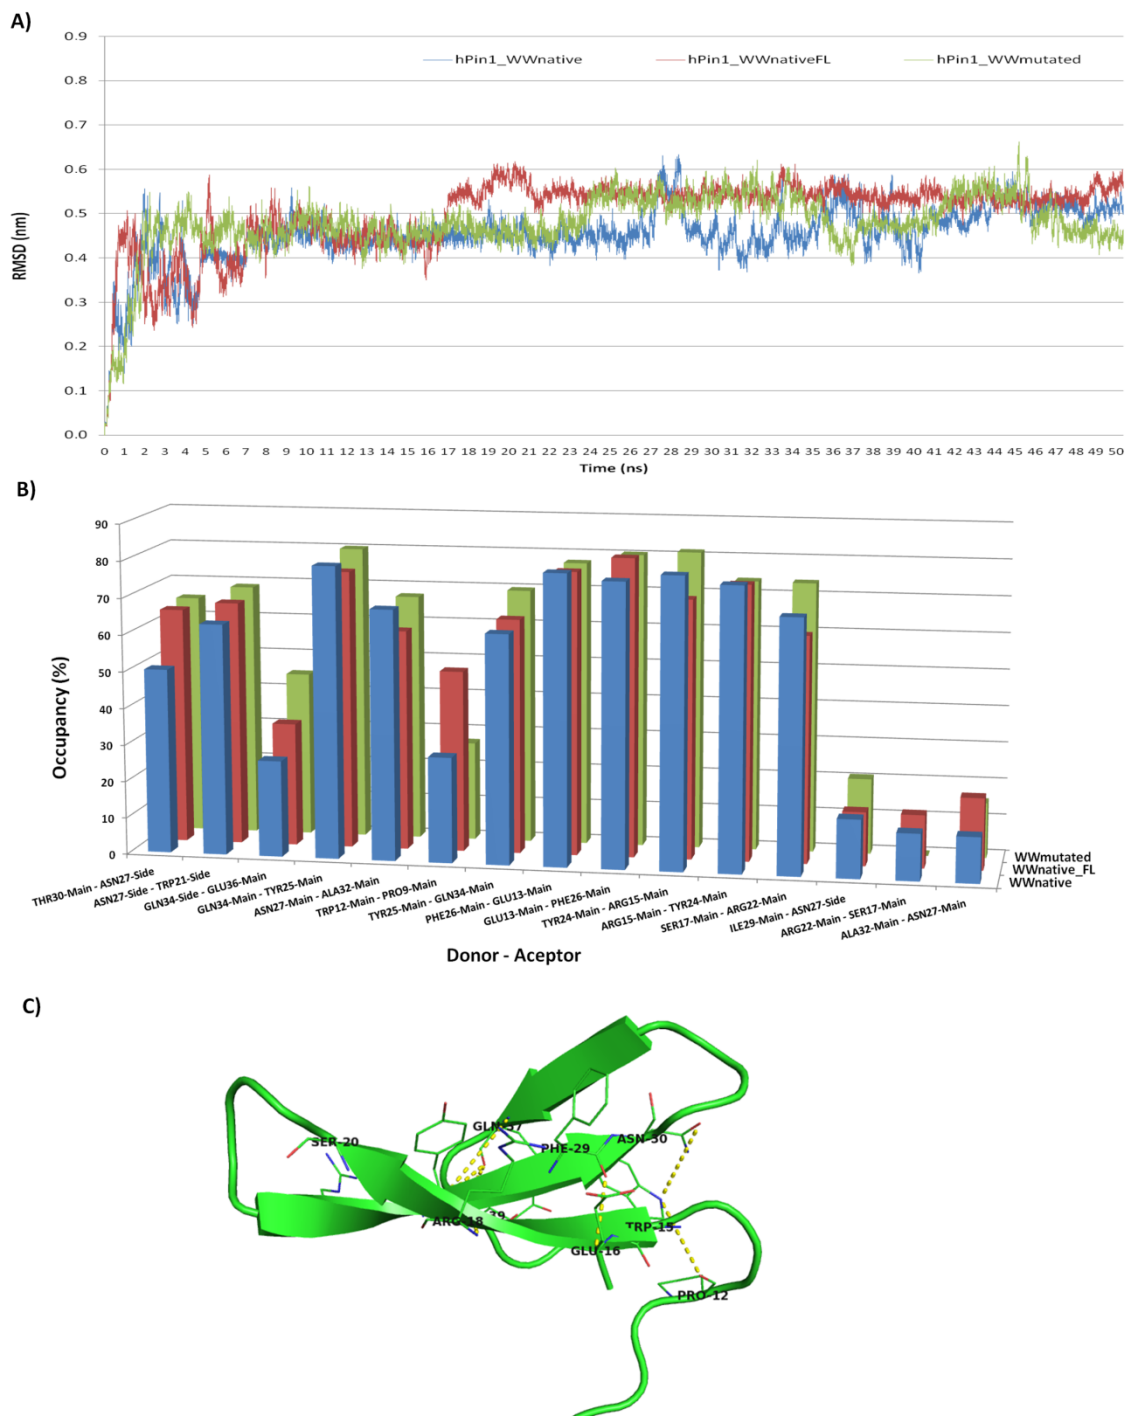

Figure S1. Molecular Dynamics results analysis for the 3 structures: hPin1\_WWnative, hPin1\_WWnativeFL and hPin1\_WWmutated: A) RMSD (Root Mean Square Deviation); B) H-Bond interactions, only shown the most frequently observed over the time of the simulation; C) Identification of the most frequent H-Bond interactions observed in B (in hPin1\_WWmutated structure). (Figure was produced using PyMol software).

## S1.2. - Molecular Docking - Affinity studies - hPin1\_WWmutated:

**Table S1.** Molecular Docking Results: hPin1\_WWmutated and different peptides.

| Ligand           | Docking Binding Energy (Kcal/mol) | Estimated Affinity Constant ( $M^{-1}$ ) | Literature Affinity Constant ( $M^{-1}$ ) | Source            |
|------------------|-----------------------------------|------------------------------------------|-------------------------------------------|-------------------|
| PPPPYP           | -10.09                            | $2.49 \times 10^7$                       | n.d.                                      | [a]               |
| VPR <b>pT</b> PV | -7.31                             | $2.28 \times 10^5$                       | $2.04 \times 10^5$                        | Native ligand [b] |
| VPR <b>T</b> PV  | -5.94                             | $2.26 \times 10^4$                       | n.d.                                      | -                 |

[a] Native ligand shorter version of YAP65 WW domain (Group I) <sup>1</sup>  
[b] Ligand described by Verdecia, M *et al* <sup>2</sup> with highest affinity constant with hPin1\_WW.  
n.d. - non determined

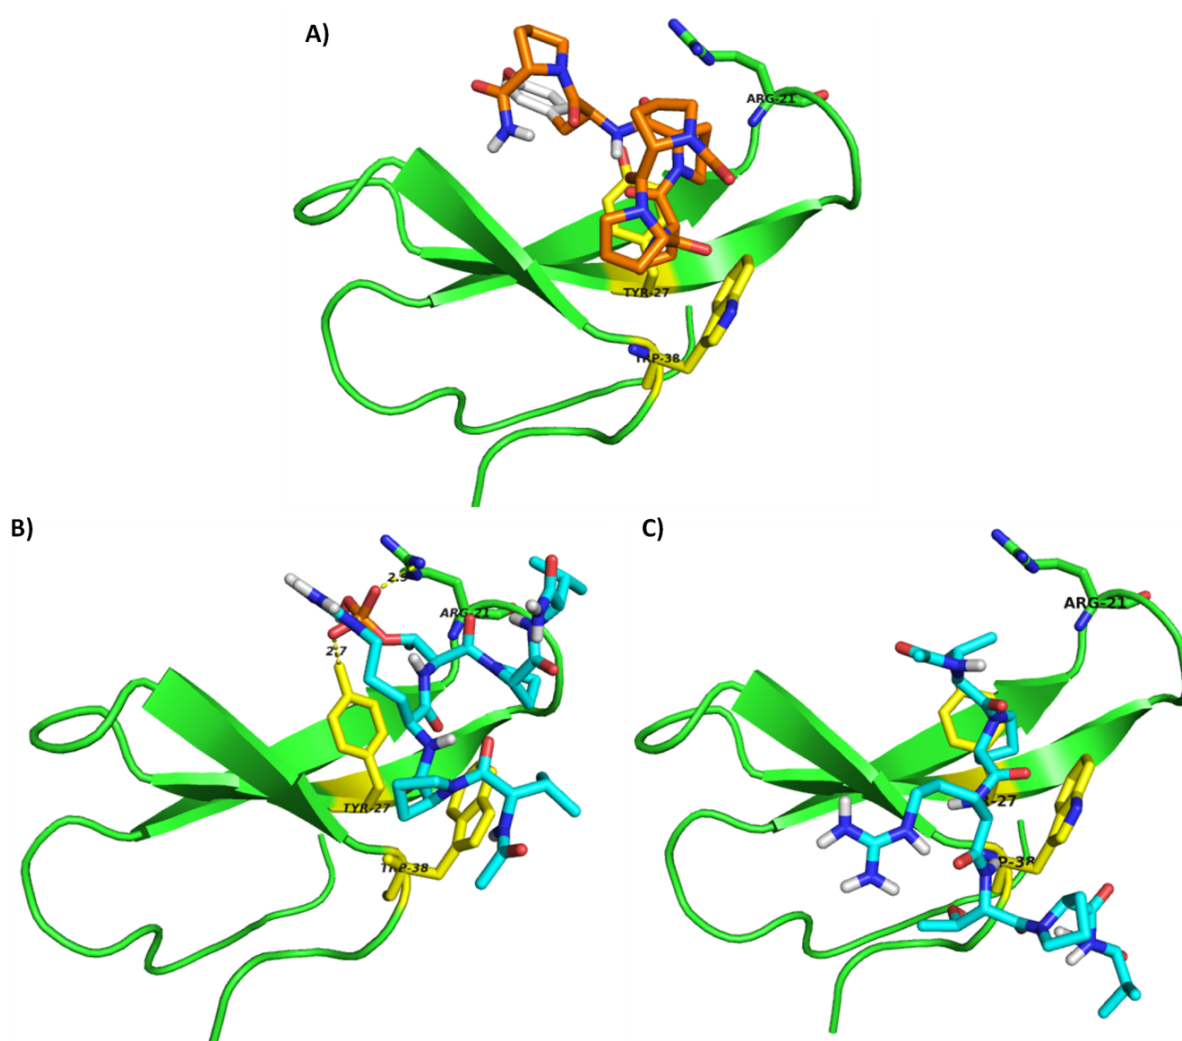

Figure S2. Molecular Docking results analysis, where hPin1\_WWmutated was used as receptor and peptides, PPPYP, VPRpTPV and VPRTPV were used as ligands. These conformations correspond to the values estimated in Table S1. In yellow the Tyr-27 and Trp-38 that form the "X-P-groove region". A) Best docking conformation of hPin1\_WWmutated against PPPYP, B) Best docking conformation of hPin1\_WWmutated against VPRpTPV; and C) Best docking conformation of hPin1\_WWmutated against VPRTPV. (Figures were produced using PyMol software).

## S2. Peptide Solid-phase Chemical Synthesis and Characterization

## S2.1 - Conditions for the standard and pseudoproline units protocol for peptide chemical synthesis

**Table SII.** Microwave Synthesis conditions for hPin1\_WWmutated

| Method                                                                                |                                | Reagents                              | Power (watts)                        | Temperature (°C) | Reaction Time (sec)                      |
|---------------------------------------------------------------------------------------|--------------------------------|---------------------------------------|--------------------------------------|------------------|------------------------------------------|
| Standard                                                                              | Resin                          | Rink Amide MBHA resin<br>100-200 mesh | -                                    | -                | -                                        |
|                                                                                       | Deprotection                   | 20% piperidine/DMF                    | 35                                   | 75               | 217                                      |
|                                                                                       | Coupling                       | HOBT/HBTU/DIEA/DMF                    | 25                                   | 75               | 304                                      |
|                                                                                       | Coupling Arg (double coupling) | HOBT/HBTU/DIEA/DMF                    | 0 <sup>a)</sup> and 25 <sup>b)</sup> | 50               | 1805 <sup>a)</sup> and 305 <sup>b)</sup> |
|                                                                                       | Coupling His, Cys, Asp         | HOBT/HBTU/DIEA/DMF                    | 0                                    | 50               | 733                                      |
|                                                                                       | Capping                        | 10% Acetic Anhydrid                   | 1                                    | 75               | 126                                      |
| Pseudoproline Units                                                                   | Resin                          | NovaPEG Rink amide resin              | -                                    | -                | -                                        |
|                                                                                       | Deprotection                   | 20% piperidine/DMF                    | 35                                   | 75               | 217                                      |
|                                                                                       | Deprotection after 23 residue  | 20% piperidine/DMF                    | 35                                   | 75               | 341                                      |
|                                                                                       | Coupling                       | HBTU/DIEA/DMF                         | 25                                   | 75               | 304                                      |
|                                                                                       | Coupling Arg (double coupling) | HBTU/DIEA/DMF                         | 0 <sup>a)</sup> and 25 <sup>b)</sup> | 50               | 1950 <sup>a)</sup> and 400 <sup>b)</sup> |
|                                                                                       | Coupling after 23 residue      | HBTU/DIEA/DMF                         | 25                                   | 75               | 605                                      |
|                                                                                       | Capping after 23 residue       | 10% Acetic Anhydrid                   | 1                                    | 75               | 126                                      |
| Note: Arginine residue requires double coupling: a) 1st coupling and b) 2nd coupling. |                                |                                       |                                      |                  |                                          |

## S2.2 Reverse-Phase HPLC hPin1\_WWmutated:

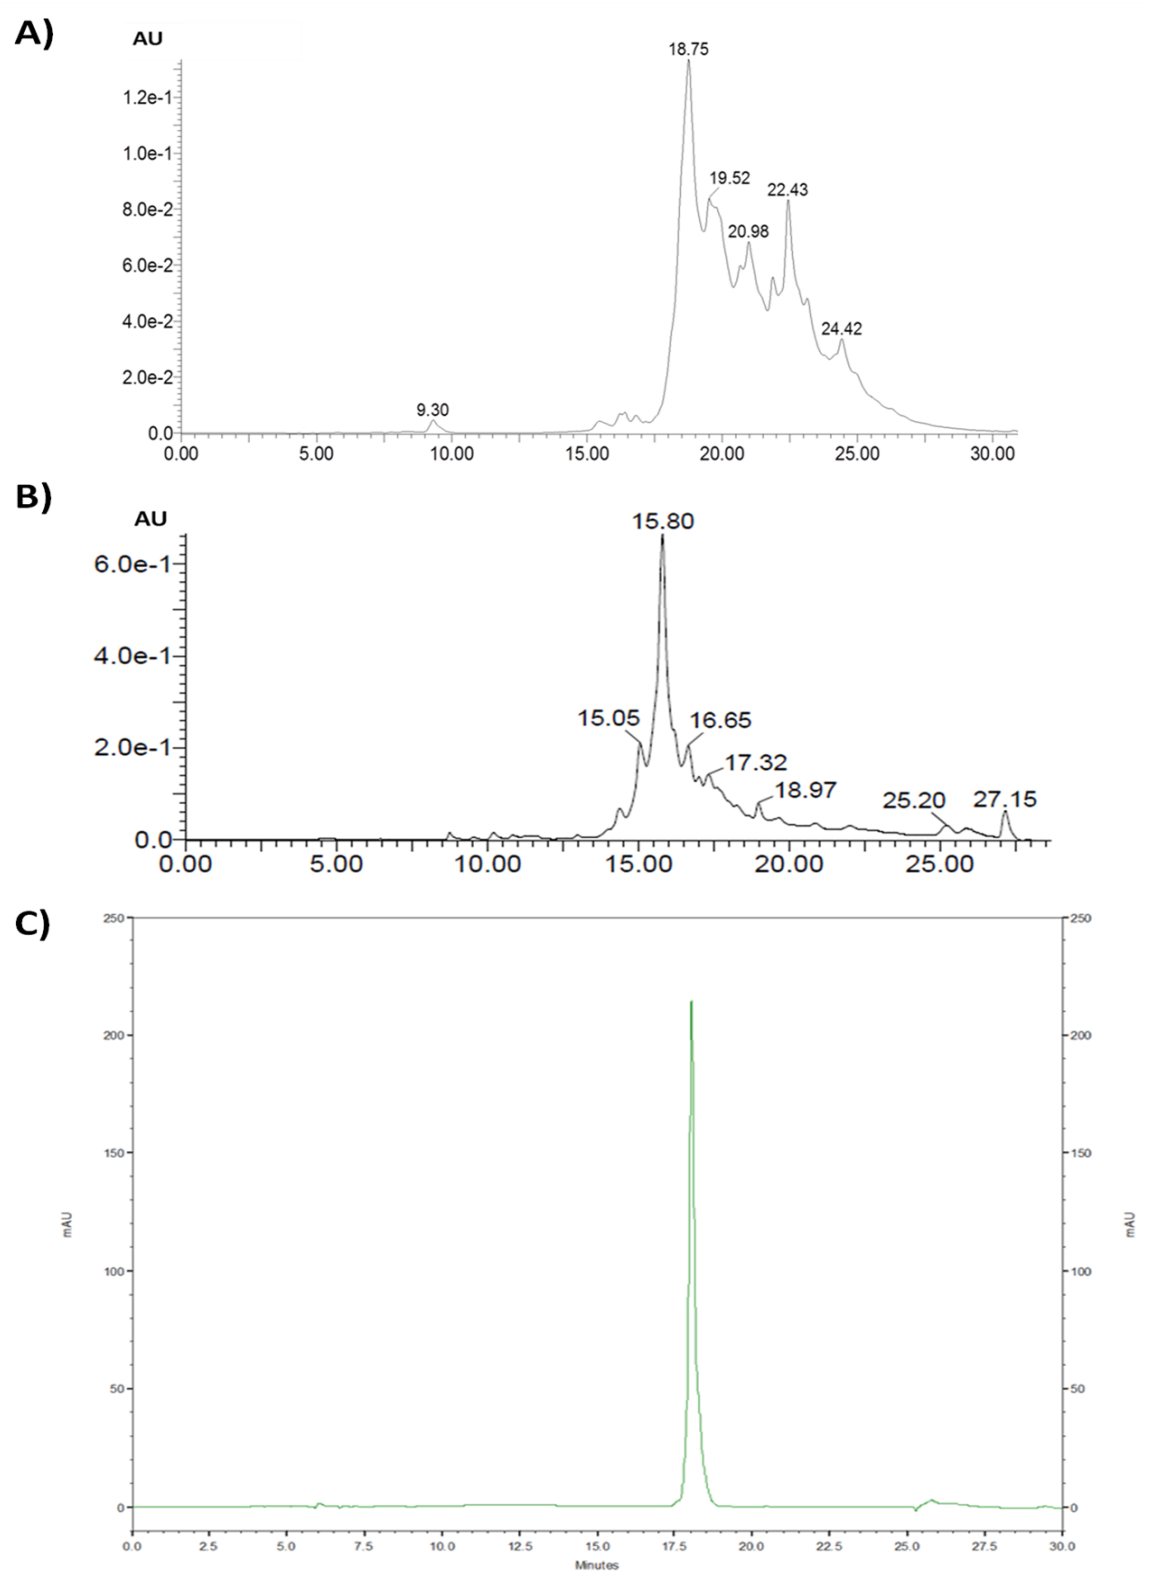

Figure S3. Reverse-Phase HPLC chromatograms: A) Preparative HPLC of the crude product of hPin1\_WWmutated obtained by standard SPPS (without pseudoproline); B) Preparative HPLC of crude product of hPin1\_WWmutated obtained by SPPS with pseudoproline strategy; C) Analytical HPLC chromatogram of purified hPin1\_WWmutant. HPLC conditions used are described in the main text.

### S2.3 - Electrospray Ionization-Mass spectrometry (ESI-MS)

The ESI-MS spectra of hPin1\_WWmutated (Figure S3) were acquired in positive mode on a mass spectrometer API-linear Ion trap (PO03MS), model LTQ (Thermo-Finnigan) by direct infusion at a flow rate of 5  $\mu$ L/min. All the spectra were obtained by the Mass Spectrometry Laboratory of the Analytical Services Unit at the Instituto de Tecnologia Química e Biológica António Xavier, Universidade Nova de Lisboa.

#### ESI-MS hPin1\_WWmutated:

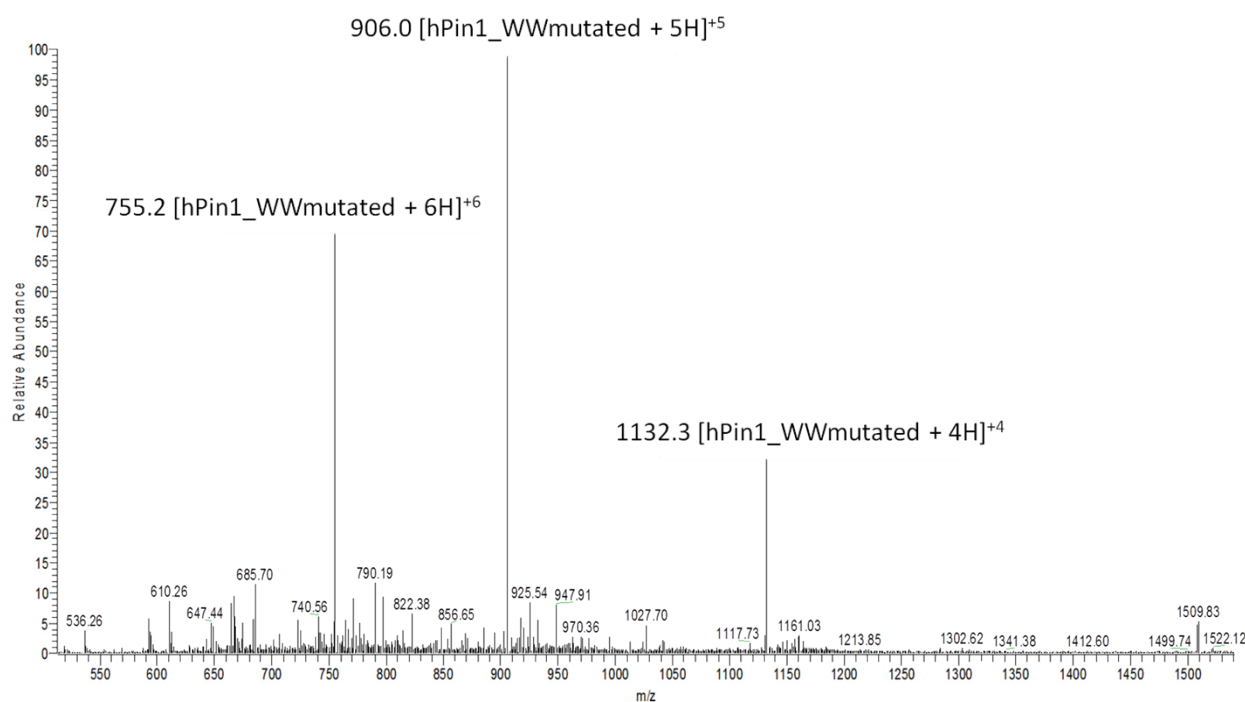

Figure S4. ESI-MS spectrum of hPin1\_WWmutated (Acetyl - CADEEKLPPGW EK RMRSSGRVYYFNHITNASQWE RPG-NH<sub>2</sub>, Molecular Formula: C<sub>198</sub>H<sub>296</sub>N<sub>60</sub>O<sub>59</sub>S<sub>2</sub>) in positive mode: m/z calcd for [hPin1\_WWmutated + 6H]<sup>+6</sup> = 755.18 Da, m/z found: 755.2; m/z calcd for [hPin1\_WWmutated + 5H]<sup>+5</sup> = 906.01 Da, m/z found: 906.0 and m/z calcd for [hPin1\_WWmutated + 4H]<sup>+4</sup> = 1132.26 Da, m/z found: 1132.3.

#### References:

1. E. K. Koepf, H. M. Petrassi, M. Sudol and J. W. Kelly, Protein Science, 1999, **8**, 841-853.
2. M. A. Verdecia, M. E. Bowman, K. P. Lu, T. Hunter and J. P. Noel, Nat Struct Mol Biol, 2000, **7**, 639-643.
